# Supplementary material for: Injectable postoperative enzyme-responsive hydrogels for reversing temozolomide resistance and reducing local recurrence after glioma operation
Source: Royal Society of Chemistry journal article supplement (doi:10.1039/d0bm00338g), 2020-01-01
Supplement: d0bm00338g1.pdf [file d0bm00338g1.pdf]

## Supporting information

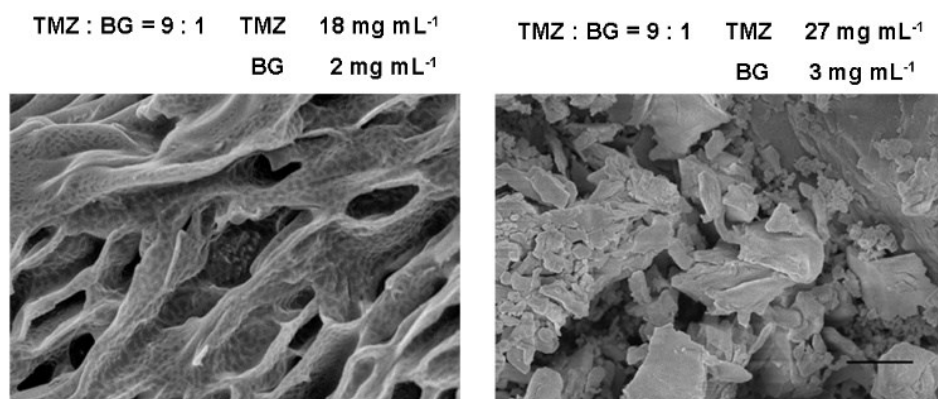

Figure S1. SEM images show a clear 3D porous network of different drug concentrations in the Tm hydrogel. Scale bar = 4  $\mu$ m.

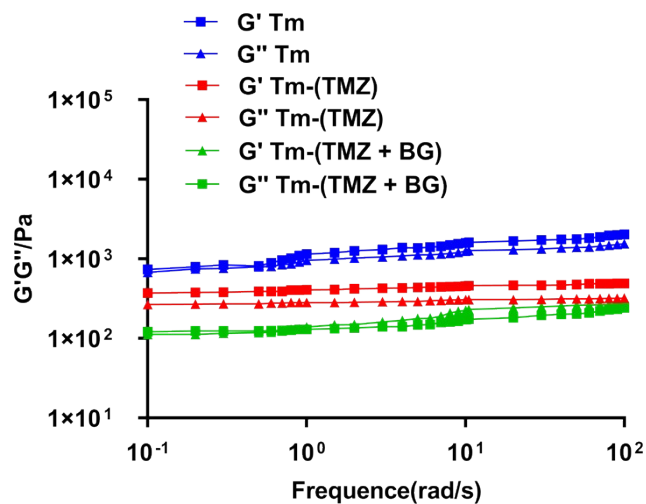

Figure S2. Rheological behaviors of the Tm, Tm (TMZ) and Tm (TMZ + BG).

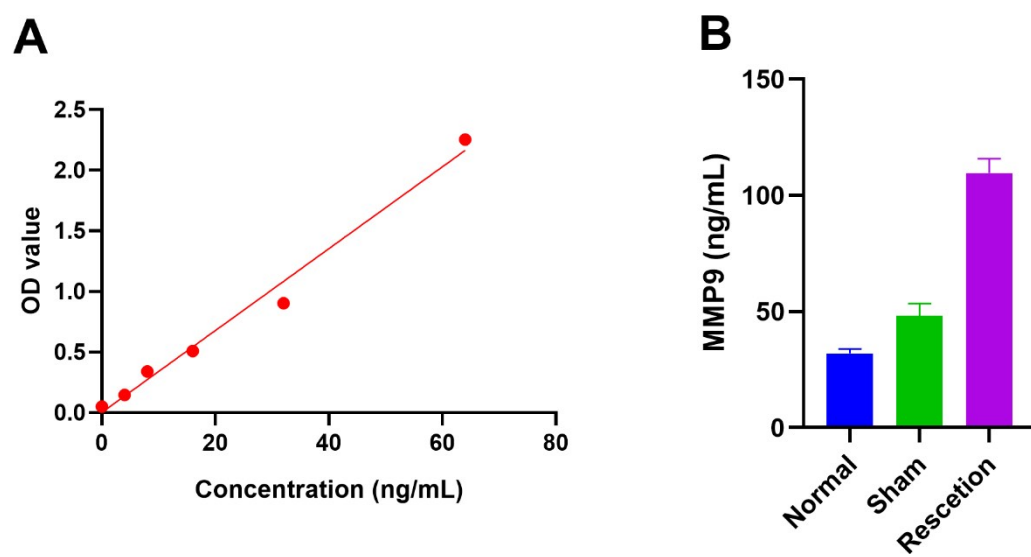

(A) standard curve. (B) MMP9 expressions in Normal group, Glioma group, Sham group, Resection group *in vivo*.
